# Supplementary material for: Effect of Yarrowia lipolytica yeast biomass with increased kynurenic acid content on selected metabolic indicators in mice
Source: PeerJ. 2023 Sep 26;11:e15833. doi: 10.7717/peerj.15833 (PMC10540775; doi:10.7717/peerj.15833)
Supplement: Supplemental Information 1 [file peerj-11-15833-s001.xlsx]

## Sheet: Table 1
	KYNA (g/kg)			Crude protein (g/kg)			Crude fat (g/kg)			Crude fiber (g/kg)			Crude ash (g/kg)			Metabolizable energy (kcal/100 g)
Low-KYNA yeast	0.298021		Low-KYNA yeast	454.1		Low-KYNA yeast	15.4		Low-KYNA yeast	71.1		Low-KYNA yeast	54.1		Low-KYNA yeast	355.9
	0.281174			438.7			13.4			73.567			54.3		High-KYNA yeast	334.4
	0.287265		High-KYNA yeast	303.5		High-KYNA yeast	18.9		High-KYNA yeast	161.1			54.7
High-KYNA yeast	0.642756			303.3			20.2			160.1		High-KYNA yeast	25.2
	0.878523												25.2
	0.870029												25.3

## Sheet: Table 2
	Amino acids (g/kg crude protein)	Low-KYNA yeast	High-KYNA yeast
		Essential amino acids (EAA)
	Lysine	71.196	50.5788
		76.099	50.5613
	Leucine	61.9718	31.8903
		64.9124	35.1335
	Threonine	49.3855	62.9413
		58.843	64.6605
	Valine	51.8082	39.1826
		53.239	40.5086
	Isoleucine	40.8828	28.0845
		42.8528	29.8252
	Phenylalanine	40.0502	27.2053
		42.3607	25.6094
	Methionine	18.4284	10.5111
		19.099	9.83965
	Tryptophan	11.425	9.55351
		11.0616	9.43957
		Semi-essential amino acids (SEAA)
	Arginine	40.2352	22.2348
		43.192	22.5348
	Histidine	24.7453	18.6762
		26.7195	17.9145
		Non-essential amino acids (NEAA)
	Glutamic acid	149.437	93.2617
		160.429	95.9835
	Aspartic acid	99.483	77.8467
		104.008	79.8952
	Alanine	82.03	64.148
		86.0099	65.8896
	Serine	58.172	67.3866
		60.6911	68.2861
	Glycine	54.547	47.5864
		58.3672	48.8817
	Tyrosine	51.56	22.2123
		55.4843	20.4898
	Proline	44.4315	51.0158
		48.7231	51.9806
	Cysteine	12.4286	10.4844
		13.0677	11.0276
		Amino acid groups and ratios
	Total amino acids (TAA)	962.217	734.8
		1025.16	748.461
	Essential amino acids (EAA)	345.148	259.947
		368.468	265.578
	Semi-essential amino acids (SEAA)	64.9805	40.911
		69.9115	40.4492
	Non-essential amino acids (NEAA)	552.089	433.942
		586.78	442.434

## Sheet: Figure 1
	Ferric-reducing antioxidant power (mg TROLOX/g)				Phenols (mg quercetin/g)			GSH (μg/g)
	Low-KYNA yeast	8.85117		Low-KYNA yeast	1.63333		Low-KYNA yeast	165.768
		8.7374			2.96667			175.041
		8.85117			2.3			120.121
		8.53261			2.3			166.703
		7.46319			2.3			163.683
		7.73624			2.96667			168.644
	High-KYNA yeast	5.73392		High-KYNA yeast	0.3		High-KYNA yeast	115.233
		5.48363			0.3			119.258
		6.28			0.966667			116.742
		6.39377			0.3			115.233
		5.11957			0.3			113.364
		4.32319			0.966667			117.677

## Sheet: Table 3
		Crude protein (g/kg diet)			Crude fat (g/kg diet)			Crude fiber (g/kg diet)			Crude ash (g/kg diet)			Dry matter (g/kg diet)			Metabolizable energy (kcal/100 g)
	Control	120.8		Control	33.7		Control	14.6		Control	26.9219		Control	915.091		Control	398.9
		124.508			32.8			16.68			25.6112			912.224		KYNA	401.3
	KYNA	123.8		KYNA	32.1		KYNA	16			25.6244			912.059		Low-KYNA yeast	401.3
		126.4			34.2			12.465		KYNA	28.174		KYNA	917.605		High-KYNA yeast	401.3
	Low-KYNA yeast	129.1		Low-KYNA yeast	33.5		Low-KYNA yeast	9.9			25.5492			916.322
		129.3			31.2			10			25.7153			917.166
	High-KYNA yeast	125.399		High-KYNA yeast	31.9		High-KYNA yeast	10.285		Low-KYNA yeast	30.3901		Low-KYNA yeast	920.262
		134.489			30.3			11.4			29.2711			917.971
											29.0215			919.58
										High-KYNA yeast	27.1802		High-KYNA yeast	915.647
											26.7903			915.846
											27.5818			913.52

## Sheet: Table 4
	Amino acids (g/kg crude protein)	Control	KYNA	Low-KYNA yeast	High-KYNA yeast
		Essential amino acids (EAA)
	Leucine	85.2347	87.2791	76.6337	83.3362
		84.4503	79.5216	76.8629	84.0801
	Lysine	81.874	78.2698	70.3957	78.2946
		82.9247	79.0942	73.3514	77.6414
	Valine	56.3352	57.7778	52.3173	55.9693
		59.6399	56.188	53.3864	55.1362
	Phenylalanine	45.4639	46.589	39.0672	43.3407
		46.5747	46.0921	41.879	42.3975
	Threonine	39.0645	38.1461	38.4011	41.5231
		38.2801	39.3857	39.7627	40.7912
	Isoleucine	37.1544	37.8842	35.386	35.3917
		37.1016	35.2006	35.1733	35.4815
	Methionine	28.1158	28.7674	27.0409	42.689
		29.4139	28.5201	26.0396	43.7292
	Tryptophan	16.3598	14.9642	15.7073	15.1525
		15.7841	15.5999	15.1942	15.0017
		Semi-essential amino acids (SEAA)
	Histidine	30.509	29.7139	25.66	28.8679
		30.4913	30.2472	27.2581	27.9589
	Arginine	27.664	28.7454	26.7228	35.8109
		28.5107	27.4149	27.5551	29.4967
		Non-essential amino acids (NEAA)
	Glutamic acid	240.595	235.955	205.518	229.6
		216.941	235.749	215.211	223.757
	Proline	99.882	85.7669	82.8021	98.6849
		107.513	94.259	87.4031	97.1181
	Aspartic acid	70.0309	67.9393	66.6073	70.3647
		69.7911	68.7819	70.1568	69.4934
	Serine	52.4513	53.6606	50.9197	55.088
		52.8714	54.328	52.7647	55.5673
	Alanine	26.1339	27.0887	33.4714	28.5869
		25.3983	27.0443	33.5267	28.6767
	Tyrosine	22.7204	25.7806	21.6438	24.8697
		24.9001	25.5185	20.212	25.7569
	Glycine	16.3421	16.5965	20.4781	19.2891
		15.9015	16.7524	20.9476	18.4745
	Cysteine	4.37695	4.5513	5.54327	5.68218
		4.51507	4.32473	5.40706	6.01715
		Amino acid groups and ratios
	Total amino acids (TAA)	980.307	965.476	894.315	992.541
		971.003	964.022	922.092	976.575
	Essential amino acids (EAA)	389.602	389.678	354.949	395.697
		394.169	379.602	361.65	394.259
	Semi-essential amino acids (SEAA)	58.173	58.4593	52.3829	64.6789
		59.002	57.6621	54.8132	57.4557
	Non-essential amino acids (NEAA)	532.532	517.339	486.983	532.165
		517.832	526.758	505.629	524.861

## Sheet: Figure 2
		Body weight gain per cage (g)									Food intake per cage (g/100 g body weight)									Protein efficiency ratio
		0-7	0-14	0-21	0-28	0-35	0-42	0-49			0-7	0-14	0-21	0-28	0-35	0-42	0-49
	Control	6.934	8.123	10.848	12.324	13.32	14.272	16.965		Control	91.2496	169.583	244.023	319.471	388.52	458.37	513.152		Control	0.204343
		5.98	11.641	12.706	15.647	15.812	17.044	19.55			83.0621	161.482	238.421	304.411	370.358	432.928	485.571			0.250183
		5.921	7.762	10.326	13.268	13.801	15.548	17.981			93.159	168.703	241.963	311.262	381.226	448.179	507.462			0.21733
		2.942	4.906	6.098	6.849	8.986	15.844	17.921			91.8511	173.085	248.995	324.085	391.382	448.375	515.662			0.199131
	KYNA	5.596	12.044	13.733	15.292	16.317	19.034	22.147		KYNA	84.1323	158.42	230.6	298.998	364.103	431.124	489.248		KYNA	0.260984
		-1.89	3.182	6.985	11.999	13.332	15.943	17.833			83.2335	158.206	228.941	296.224	365.734	431.798	498.553			0.185327
		-3.816	1.316	5.664	11.431	14.3	14.092	18.578			81.4635	155.163	224.177	287.877	348.634	418.989	477.471			0.206368
		3.698	6.59	9.596	12.824	16.406	16.468	20.839			88.8167	162.346	229.753	298.224	363.957	435.304	493.434			0.224619
	Low-KYNA yeast	2.543	13.39	13.75	18.207	22.332	23.067	22.16		Low-KYNA yeast	92.0554	170.505	250.258	319.681	384.263	456.716	529.99		Low-KYNA yeast	0.233849
		5.688	13.8	15.689	18.168	19.753	24.39	27.278			90.2394	170.448	245.16	314.142	378.058	436.779	498.966			0.294344
		9.006	14.863	17.607	17.552	20.766	21.612	24.09			92.7162	169.563	245.239	317.313	379.72	449.668	517.961			0.25892
		7.677	11.662	14.796	14.807	16.661	19.687	21.604			90.2749	167.585	240.213	314.213	377.99	444.159	510.248			0.229971
	High-KYNA yeast	5.403	10.392	14.615	14.281	16.273	18.29	18.571		High-KYNA yeast	91.9917	167.697	241.553	317.15	386.482	456.554	530.223		High-KYNA yeast	0.192315
		5.611	11.695	16.277	15.917	20.163	19.499	24.536			96.5627	173.188	244.59	316.185	376.257	448.093	505.379			0.252124
		2.89	8.667	10.094	12.228	12.88	15.366	17.192			88.1656	165.233	243.475	316.574	386.732	456.56	523.734			0.172443
		9.001	16.543	17.114	17.147	18.75	18.577	23.892			95.1405	170.411	246.069	315.01	379.21	446.771	504.719			0.252827

## Sheet: Table 5
		Red blood cells (106/mm3)	Hemoglobin (g/dL)	Hematocrit (%)	Mean corpuscular volume (fL)	Mean corpuscular hemoglobin concentration (g/dL)	White blood cells (103/mm3)	Band neutrophils (%)	Segmented neutrophils (%)	Eosinophils (%)	Lymphocytes (%)	Monocytes (%)	Platelets (103/mm3)
	Control	6.92	9.3	36.18	52	25.6	2.32	0	38	0	62	0	758
		8.64	13.9	46.24	54	30.1	2.49	0	34	0	66	0	711
		9.19	15.5	48.92	53	31.6	4.03	0	42	0	56	2	488
		8.69	14.5	46.45	53	31.1	3.68	0	24	5	71	0	691
		9.37	15.3	51.14	55	29.9	4.85	0	32	0	68	0	751
		9.45	14.8	49.84	53	29.7	4.09	0	32	0	66	2	824
	KYNA	8.92	13.9	38.36	43	36.1	3.43	0	22	0	78	0	798
		8.66	13.7	37.55	43	36.5	5.47	0	40	0	60	0	599
		8.84	14.4	40	45	36	3.43	2	30	0	64	4	563
		8.95	13.6	44.21	49	30.8	3.69	0	44	0	56	0	617
		8.08	13.6	40.78	50	33.3	2.54	0	43	0	57	0	521
		8.37	13.5	45.12	54	29.9	3.94	0	26	0	72	2	744
	Low-KYNA yeast	9.23	14.7	48.47	53	30.3	3.37	0	24	0	76	0	577
		9.17	14.6	48.12	52	30.4	3.25	1	24	2	73	0	667
		9.01	13.2	44.49	49	29.7	3.68	0	32	0	68	0	679
		9.44	14.7	50.37	53	29.1	4.32	0	38	0	60	2	771
		8.58	13.9	46.58	54	29.9	5.83	0	50	0	48	2	938
		9.5	14.4	46.85	49	30.6	2.64	1	35	0	64	0	576
	High-KYNA yeast	9.01	13.2	44.92	50	29.4	3.1	1	18	0	79	2	486
		5.39	8.8	30	56	29.4	2.24	0	56	0	44	0	517
		9.68	14.5	41.52	43	34.9	3.01	0	26	3	71	0	314
		9.06	14.1	43.91	48	32	2.34	0	21	2	77	0	349
		9.14	13.8	40.53	44	34.1	2.92	0	33	2	65	0	1064
		8.38	14	42.59	51	32.9	3.48	0	22	0	78	0	1027

## Sheet: Table 6
		Total protein (g/L)	Albumins (g/L)	Globulins (g/L)	Albumin/globulin ratio	Total cholesterol (TC) (mmol/L)	High-density lipoproteins (HDL) (mmol/L)	TC/HDL ratio	Triacylglycerols (mmol/L)	Glucose (mmol/L)	Aspartate aminotransferase (U/L)	Alanine aminotransferase (U/L)	Lactate dehydrogenase (U/L)	Gamma-glutamyl transpeptidase (U/L)	Urea (mmol/L)	Creatinine (μmol/L)	Urea/creatinine ratio
	Control	54.3	41.2	13.1	3.14504	0.908845	0.772236	1.1769	2.15978	1.63253	141	26.9	746.8	2.07	0.364667	2.4838	146.818
		57.5	49.3	8.2	6.0122	0.926909	0.731592	1.26698	1.43383	1.52076	416.6	21.8	428.9	0.73	0.391763	3.2741	119.655
		56.6	50.3	6.3	7.98413	1.16061	0.543049	2.13721	2.97717	0.98223	81.8	24.1	429.4	1.69	0.310475
						1.24754	0.563371	2.21443	3.85666	1.8764	353.5	37
						1.0082	0.416601	2.42005	3.46603	1.68221	102.8	33
						0.991262	0.388376	2.55233	2.98846
	KYNA	43.5	40.2	3.3	12.1818	1.05787	0.380473	2.78042	2.6046	1.82108	57.1	17.3	390.1	0.53	0.475196	4.1773	113.757
		41.1	41.1	0		1.11432	0.390634	2.8526	3.69522	2.05139	379.8	47.3	829.74	10.15	0.537404	3.79344	141.667
		47.4	40.7	6.7	6.07463	1.18997	0.443697	2.68193	2.61815	1.41915	97.3	22.4	394.7	2.18	0.511437	2.0322	251.667
		52.9	45.9	7	6.55714	1.27577	0.536275	2.37895	4.10956	1.2419	422.3	30.7	1169.2	2.31	0.55321	6.5482	84.4828
		47.7	44.5	3.2	13.9062	1.09061	0.373699	2.91843	2.18687	2.11123	396.2	34	906.7	0.65	0.5645	2.9354	192.308
		53.8	50.7	3.1	16.3548	1.0669	0.661594	1.61263	2.04236	1.1798	427.8	34.5	1288	3.96	0.407569	3.2741	124.483
	Low-KYNA yeast	55.7	47.7	8	5.9625	1.43835	0.572403	2.51282	4.01811	1.27238	368.1	33.9	1111	3.99	0.34999	3.8386	91.1765
		54.1	47.6	6.5	7.32308	1.28932	0.784655	1.64317	3.45361	1.48125	387.4	38	971	4.25	0.386118	4.83212	79.9065
		53.3	46.5	6.8	6.83824	1.38867	0.814009	1.70596	1.9272	1.64947	283.9	17.6	533	2.04	0.514824	3.8386	134.118
		55.6	44.3	11.3	3.92035	1.15497	0.48547	2.37907	2.02204	1.70479	62.3	13.5	306	3.31	0.457245	5.645	81
		61.9	50.6	11.3	4.47788	1.38641	0.588209	2.35701	4.58261	1.74995	270.2	39.6	1191.2	5.49	0.566758	2.7096	209.167
		53.9	51.4	2.5	20.56	1.34012	0.528372	2.53632	3.57328	2.258	267.3	35.6	760.4	2.01	0.604015	8.1288	74.3056
	High-KYNA yeast	50	43.4	6.6	6.57576	1.30061	0.477567	2.7234	3.35878	0.985617	124.9	24.9	463.5	1.35	0.721431	6.8869	104.754
		50.2	40.9	9.3	4.39785	1.13126	0.435794	2.59585	2.63283	1.40899	424.7	50.2	1413.6	1.02	0.624337	3.4999	178.387
		49.1	41.3	7.8	5.29487	1.33786	0.540791	2.4739	3.04265	1.10303	312.3	35.2	1148.4	4.58	0.534017	4.516	118.25
		50.8	43.9	6.9	6.36232	1.47673	0.509179	2.90022	2.80444	1.94978	265.8	39.1	1148.6	1.966	0.558855	3.4999	159.677
		55.1	48.5	6.6	7.34848	1.47447	0.73385	2.00923	3.20636	1.92607	411.8	33.4	1171.8	2.06	0.46289	1.8064	256.25
		48.9	45.6	3.3	13.8182	1.07142	0.394021	2.7192	3.33168	1.50044	113.7	19.1	509.2	0.82	0.626595	9.8223	63.7931

## Sheet: Figure 3
		Ferric-reducing antioxidant power (mg TROLOX/g)			TBARS (μg/g)			Protein carbonyls (μmol/g)
	Control	2.68449		Control	38.3676		Control	1.01405
		2.42389			38.482			0.964995
		2.16106			31.7244			0.859326
		2.26582			24.2291			0.900753
		2.19338			32.7616			0.675313
		2.44587			23.5561			0.662559
	KYNA	2.43325		KYNA	34.4579		KYNA	0.973282
		2.46074			31.9346			0.85404
		2.50253			32.1244			1.05243
		2.4775			33.3691			0.939294
		2.28954			29.5003			0.828259
		2.40921			37.1504			0.879681
	Low-KYNA yeast	2.50973		Low-KYNA yeast	26.2606		Low-KYNA yeast	0.619107
		2.72821			32.0265			0.704423
		2.33649			29.2372			1.02717
		2.85787			37.7531			0.739424
		2.57349			34.0066			0.935819
		2.85375			35.3341			0.991409
	High-KYNA yeast	2.41721		High-KYNA yeast	33.4252		High-KYNA yeast	1.25189
		2.55656			42.8925			0.574814
		2.64592			37.4226			0.93577
		2.53944			37.648			1.03819
		2.62277			39.7369			1.12583
		2.28032			30.7443			0.719536
